# Supplementary material for: MAPS: Model-based analysis of long-range chromatin interactions from PLAC-seq and HiChIP experiments
Source: PLoS Comput Biol. 2019 Apr 15;15(4):e1006982. doi: 10.1371/journal.pcbi.1006982 (PMC6483256; doi:10.1371/journal.pcbi.1006982)
Supplement: S1 Table — (XLSX) [file pcbi.1006982.s011.xlsx]

## Sheet: Sheet1
	Total number of long-range reads on chromosome 1 in each group (intra-chromosomal, from 2*Resolution to 1Mb)			Total number of bin pairs in each group chromosome 1 (intra-chromosomal, from 2*Resolution to 1Mb)			Average read counts per bin pair in each group (intra-chromosomal, from 2*Resolution to 1Mb)
Dataset (combining two biological replicates)	AND set	XOR set	NOT set	AND set	XOR set	NOT set	AND set	XOR set	NOT set
mESC_CTCF	276726	1203805	2666288	36913	352690	1560147	7.49671	3.41321	1.709
mESC_H3K4me3	607398	3336378	11373288	40520	769935	6988445	14.9901	4.33332	1.62744
GM12878_Smc1a	215352	1758793	6668204	53893	1131481	8764726	3.99592	1.55442	0.7608
GM12878_H3K27ac	2738698	4416755	4905221	112734	1368254	8469112	24.2935	3.22802	0.57919
