# Supplementary material for: MAPS: Model-based analysis of long-range chromatin interactions from PLAC-seq and HiChIP experiments
Source: PLoS Comput Biol. 2019 Apr 15;15(4):e1006982. doi: 10.1371/journal.pcbi.1006982 (PMC6483256; doi:10.1371/journal.pcbi.1006982)
Supplement: S5 Table — (XLSX) [file pcbi.1006982.s015.xlsx]

## Sheet: Sheet1
	Cell line	mESC	mESC	GM12878
	Resolution	5Kb	10Kb	5Kb
	In situ Hi-C data reference	Bonev et al 2017	Bonev et al 2017	Rao et al 2014
	Sequencing depth	7.3 billion	7.3 billion	4.9 billion
	Number of in-situ Hi-C HiCCUPS loops	7779	8712	6316
	Minimal raw contact frequency	12	13	13
	Minimal normalized contact frequency	1.50046	1.50004	1.501
	Max FDR	0.0992274	0.0999157	0.0999694
