# Supplementary material for: MAPS: Model-based analysis of long-range chromatin interactions from PLAC-seq and HiChIP experiments
Source: PLoS Comput Biol. 2019 Apr 15;15(4):e1006982. doi: 10.1371/journal.pcbi.1006982 (PMC6483256; doi:10.1371/journal.pcbi.1006982)
Supplement: S10 Table — (XLSX) [file pcbi.1006982.s020.xlsx]

## Sheet: Sheet1
	Sample	# of MAPS interactions	# of MAPS interactions overlapped with gene TSS	% of MAPS interactions overlapped with gene TSS
	mESC CTCF PLAC-seq	53788	17646	0.328066
	mESC H3K4me3 PLAC-seq	134179	79419	0.591888
	GM12878 Smc1a HiChIP	37951	11379	0.299834
	GM12878 H3K27ac HiChIP	170630	73854	0.432831
